# Supplementary material for: Selective depletion of regulatory T cells enhances the immunogenicity of a recombinant-based vaccine against Sporothrix spp
Source: Frontiers journal article supplement (doi:10.3389/fcimb.2022.1084526), 2023-02-10
Supplement: Presentation_1.pdf [file Presentation_1.pdf]

## Supplementary Material

### Selective depletion of regulatory T cells enhances the immunogenicity of a recombinant-based vaccine against *Sporothrix* spp.

Alexander Batista-Duharte\*<sup>†</sup>, Damiana Téllez-Martinez<sup>†</sup>, Deivys Leandro Portuondo and Iracilda Zeppone Carlos\*

Department of Clinical Analysis, School of Pharmaceutical Sciences, São Paulo State University (UNESP), Araraquara, SP, Brazil

### Correspondence

Alexander Batista-Duharte ([batista.duharte@unesp.br](mailto:batista.duharte@unesp.br)); Iracilda Zeppone Carlos ([iracilda.zeppone@unesp.br](mailto:iracilda.zeppone@unesp.br))

**Three aspects of primary lesions in the dorsal sacral region of mice infected with *S. brasiliensis*. A) Suppurative ulcer; B) Nodular lesion with a little central ulceration; C) Nodular lesion**

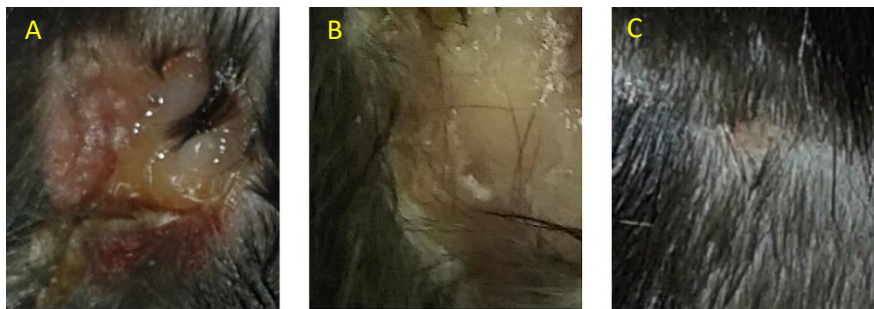

### Main clinical findings in the *S. brasiliensis*- infected mice at 35 days post infection

|                                                 | Non-vaccinated | rSSEno +G01 | rSSEno +G01 Depleted 1st dose | rSSEno +G01 Depleted 2nd dose |
|-------------------------------------------------|----------------|-------------|-------------------------------|-------------------------------|
| Suppurative ulcer                               | 5/7            | 2/7         | 1/7                           | 1/7                           |
| Nodular lesion with a little central ulceration | 2/7            | 2/7         | 3/7                           | 2/7                           |
| Nodular lesion                                  | 0/7            | 3/7         | 3/7                           | 4/7                           |
| Secondary nodular lesions along the tail        | 4/7            | 2/7         | 1/7                           | 1/7                           |
| Orchitis                                        | 5/7            | 3/7         | 1/7                           | 1/7                           |
| Yellowish-white nodules in the liver*           | 6/7            | 3/7         | 2/7                           | 2/7                           |
| Death                                           | 0/7            | 0/7         | 0/7                           | 0/7                           |

\*In vaccinated mice the nodules in the liver were scarcely present, in a small number of animals. Morphological characteristic of the yellowish-white nodules in the liver of *S. brasiliensis*- infected mice, can be seen in (Batista-Duharte et al., 2018b)
